# Supplementary material for: Design of an in vitro multienzyme cascade system for the biosynthesis of nicotinamide mononucleotide
Source: Royal Society of Chemistry journal article supplement (doi:10.1039/d1cy01798e), 2022-01-01
Supplement: d1cy01798e1.pdf [file d1cy01798e1.pdf]

## Supporting Information

### **Design of an in vitro multienzyme cascade system for the biosynthesis of nicotinamide mononucleotide**

Cailian Zhou<sup>#</sup>, Jiao Feng<sup>#</sup>, Jing Wang, Ning Hao, Xin Wang\*, Kequan Chen

State Key Laboratory of Materials-Oriented Chemical Engineering, College of Biotechnology and Pharmaceutical Engineering, Nanjing Tech University, Nanjing 211816, People's Republic of China

\*Corresponding author: Xin Wang

E-mail address: [xinwang1988@njtech.edu.cn](mailto:xinwang1988@njtech.edu.cn).

<sup>#</sup>These authors contributed equally to this work.

**Table S1 Strains and plasmids used in this work**

| Strains or plasmids          | Description                                                                                              | Source     |
|------------------------------|----------------------------------------------------------------------------------------------------------|------------|
| <b>Strains</b>               |                                                                                                          |            |
| <i>E. coli</i> BL21(DE3)     | Used as host strain                                                                                      | Invitrogen |
| <i>E. coli</i> BL21-Pynp     | <i>E. coli</i> BL21(DE3) harboring plasmid pET28a- <i>pynp</i>                                           | This study |
| <i>E. coli</i> BL21-Pnp      | <i>E. coli</i> BL21(DE3) harboring plasmid pET28a- <i>pnp</i>                                            | This study |
| <i>E. coli</i> BL21-Nadr     | <i>E. coli</i> BL21(DE3) harboring plasmid pET28a- <i>nadr</i>                                           | This study |
| <i>E. coli</i> BL21-Apt      | <i>E. coli</i> BL21(DE3) harboring plasmid pET28a- <i>apt</i>                                            | This study |
| <i>E. coli</i> BL21-AMPase   | <i>E. coli</i> BL21(DE3) harboring plasmid pET28a- <i>amn</i>                                            | This study |
| <i>E. coli</i> BL21-Rppk     | <i>E. coli</i> BL21(DE3) harboring plasmid pET28a- <i>prs</i>                                            | This study |
| <i>E. coli</i> BL21-Nampt-HD | <i>E. coli</i> BL21(DE3) harboring plasmid pET28a-nampt-HD                                               | This study |
| <i>E. coli</i> BL21-Nampt-HS | <i>E. coli</i> BL21(DE3) harboring plasmid pET28a-nampt-HS                                               | This study |
| <i>E. coli</i> BL21-Nampt-MM | <i>E. coli</i> BL21(DE3) harboring plasmid pET28a-nampt-MM                                               | This study |
| <i>E. coli</i> BL21-Nampt-LS | <i>E. coli</i> BL21(DE3) harboring plasmid pET28a-nampt-LS                                               | This study |
| <i>E. coli</i> BL21-Nampt-CP | <i>E. coli</i> BL21(DE3) harboring plasmid pET28a-nampt-CP                                               | This study |
| <i>E. coli</i> BL21-Nampt-SS | <i>E. coli</i> BL21(DE3) harboring plasmid pET28a-nampt-SS                                               | This study |
| <i>E. coli</i> BL21-Nampt-MA | <i>E. coli</i> BL21(DE3) harboring plasmid pET28a-nampt-MA                                               | This study |
| <i>E. coli</i> BL21-Nampt-EC | <i>E. coli</i> BL21(DE3) harboring plasmid pET28a-nampt-EC                                               | This study |
| <i>E. coli</i> BL21-Nampt-XL | <i>E. coli</i> BL21(DE3) harboring plasmid pET28a-nampt-XL                                               | This study |
| <i>E. coli</i> BL21-Ppk2     | <i>E. coli</i> BL21(DE3) harboring plasmid pET28a- <i>ppk2</i>                                           | This study |
| <b>Plasmids</b>              |                                                                                                          |            |
| pET28a                       | expression vector, KanR, P <sub>T7</sub> , fl ori                                                        | Invitrogen |
| pET28a- <i>pynp</i>          | pET28a containing <i>pynp</i> from <i>Bacillus licheniformis</i>                                         | This study |
| pET28a- <i>deoD</i>          | pET28a containing <i>deoD</i> from <i>Klebsiella aerogenes</i>                                           | This study |
| pET28a- <i>amn</i>           | pET28a containing <i>amn</i> from <i>E. coli</i>                                                         | This study |
| pET28a- <i>prs</i>           | pET28a containing <i>prs</i> from <i>E. coli</i>                                                         | This study |
| pET28a- <i>nadr</i>          | pET28a containing <i>nadr</i> from <i>E. coli</i>                                                        | This study |
| pET28a- <i>apt</i>           | pET28a containing <i>apt</i> from <i>E. coli</i>                                                         | This study |
| pET28a-nampt-HD              | pET28a containing the synthetic codon-optimized coding sequence of NAMPT from <i>Haemophilus ducreyi</i> | This study |
| pET28a-nampt-HS              | pET28a containing the synthetic codon-optimized coding sequence of NAMPT from <i>Homo sapiens</i>        | This study |
| pET28a-nampt-MM              | pET28a containing the synthetic codon-optimized coding sequence of NAMPT from <i>Mus musculus</i>        | This study |
| pET28a-nampt-LS              | pET28a containing the synthetic codon-optimized coding sequence of NAMPT from <i>Luteibacter</i> sp.     | This study |

---

|                 |                                                                                                            |            |
|-----------------|------------------------------------------------------------------------------------------------------------|------------|
| pET28a-nampt-CP | pET28a containing the synthetic codon-optimized coding sequence of NAMPT from <i>Chitinophaga pinensis</i> | This study |
| pET28a-nampt-SS | pET28a containing the synthetic codon-optimized coding sequence of NAMPT from <i>Sphingopyxis sp. C-1</i>  | This study |
| pET28a-nampt-MA | pET28a containing the synthetic codon-optimized coding sequence of NAMPT from <i>Macaca mulatta</i>        | This study |
| pET28a-nampt-EC | pET28a containing the synthetic codon-optimized coding sequence of NAMPT from <i>Equus caballus</i>        | This study |
| pET28a-nampt-XL | pET28a containing the synthetic codon-optimized coding sequence of NAMPT from <i>Xenopus laevis</i>        | This study |
| pET28a-ppk2     | pET28a containing synthetic <i>ppk2</i>                                                                    | This study |

---

**Table S2 Summary of enzymes used in this work**

| Name     | Enzyme                                  | EC number | NCBI accession number | Gene                 | Source                        |
|----------|-----------------------------------------|-----------|-----------------------|----------------------|-------------------------------|
| Pynp     | pyrimidine-nucleoside phosphorylase     | 2.4.2.2   | QBR18245.1            | <i>pynp</i>          | <i>Bacillus licheniformis</i> |
| Pnp      | purine nucleoside phosphorylase         | 2.4.2.1   | VDZ69745.1            | <i>deoD</i>          | <i>Klebsiella aerogenes</i>   |
| NADR     | ribosylnicotinamide kinase              | 2.7.1.22  | NP_418807.4           | <i>nadR</i>          | <i>Escherichia coli</i>       |
| AMPase   | AMP nucleosidase                        | 3.2.2.4   | NP_416489.1           | <i>amn</i>           | <i>Escherichia coli</i>       |
| RPPK     | ribose-phosphate diphosphokinase        | 2.7.6.1   | NP_415725.1           | <i>prs</i>           | <i>Escherichia coli</i>       |
| Apt      | adenine phosphoribosyltransferase       | 2.4.2.7   | NP_415002.1           | <i>apt</i>           | <i>Escherichia coli</i>       |
| Nampt-HD | nicotinamide phosphoribosyl transferase | 2.4.2.12  | WP_010945301.1        | putative <i>nadV</i> | <i>Haemophilus ducreyi</i>    |
| Nampt-HS | nicotinamide phosphoribosyl transferase | 2.4.2.12  | NP_005737.1           | <i>nampt</i>         | <i>Homo sapiens</i>           |
| Nampt-MM | nicotinamide phosphoribosyl transferase | 2.4.2.12  | NP_067499.2           | <i>nampt</i>         | <i>Mus musculus</i>           |
| Nampt-LS | nicotinamide phosphoribosyl transferase | 2.4.2.12  | SFW68293.1            | <i>nampt</i>         | <i>Luteibacter</i> sp.        |
| Nampt-CP | nicotinamide phosphoribosyl transferase | 2.4.2.12  | WP_012788281.1        | <i>nampt</i>         | <i>Chitinophaga pinensis</i>  |
| Nampt-SS | nicotinamide phosphoribosyl transferase | 2.4.2.12  | WP_062182430.1        | <i>nampt</i>         | <i>Sphingopyxis</i> sp. C-1   |
| Nampt-MA | nicotinamide phosphoribosyl transferase | 2.4.2.12  | XP_014990151.1        | <i>nampt</i>         | <i>Macaca mulatta</i>         |
| Nampt-EC | nicotinamide phosphoribosyl transferase | 2.4.2.12  | XP_023494644.1        | <i>nampt</i>         | <i>Equus caballus</i>         |
| Nampt-XL | nicotinamide phosphoribosyl transferase | 2.4.2.12  | NP_001089988.1        | <i>nampt</i>         | <i>Xenopus laevis</i>         |
| PPK2     | polyphosphate kinase <sub>2</sub>       | 2.7.4.1   | RVP31066.1            | <i>ppk2</i>          | <i>Sinorhizobium meliloti</i> |

**Table S3 Primers used in this work**

| Name     | Primer sequence (5'-3')                                            |
|----------|--------------------------------------------------------------------|
| Pynp F   | CATG <u>CCATGG</u> GaacaccaccaccaccacATGAGAATGGTTGATATCATCACA      |
| Pynp R   | CGCGGATCCCTATTCCGTAATCACCGTATGCACAA                                |
| Pnp F    | CATG <u>CCATGG</u> GaacaccaccaccaccacATGGCCACCCCACACATTAA          |
| Pnp R    | CCCAAGCTTTTACTCTTTATCACCCAGCAGTACGG                                |
| NADR F   | CATG <u>CCATGG</u> GaacaccaccaccaccacATGTCGTCATTTGATTACCTGAAAACCTG |
| NADR R   | C<br><br>CCGGAATTCTTATCTCTGCTCCCCATCATCT                           |
| AMPase F | CATG <u>CCATGG</u> GaacaccaccaccaccacATGAATAATAAGGGCTCCGGTCTG      |
| AMPase R | CCCAAGCTTTTATCGGAACGGCGGCTC                                        |
| RPPK F   | CATG <u>CCATGG</u> GaacaccaccaccaccacGTGCCTGATATGAAGCTTTTTGCT      |
| RPPK R   | CCGGAATTCTTAGTGTTTCGAACATGGCAGAGAT                                 |
| Apt F    | CC <u>CATGG</u> GaacaccaccaccaccacATGACCGCGACTGCACAG               |
| APT R    | GGAATTCTTAATGGCCCGGGAACGG                                          |

Underline indicates the cleavage sites of restriction enzyme and lowercase letters indicate the His Tag sequence.

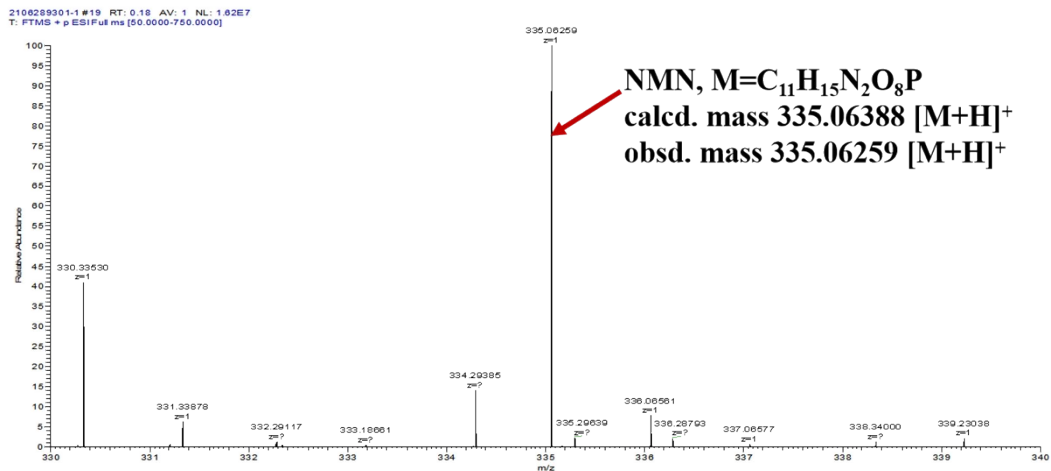

**Figure S1 MS result of the reaction product.**

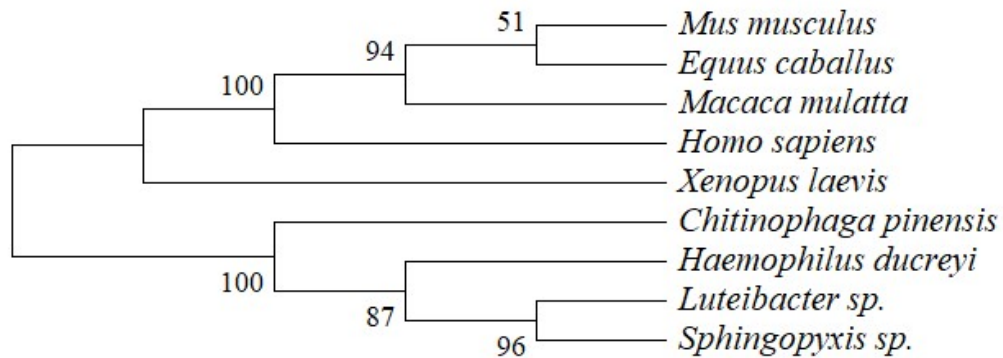

**Figure S2 Amino-acid sequence homology analysis for nine different NAMPT.**

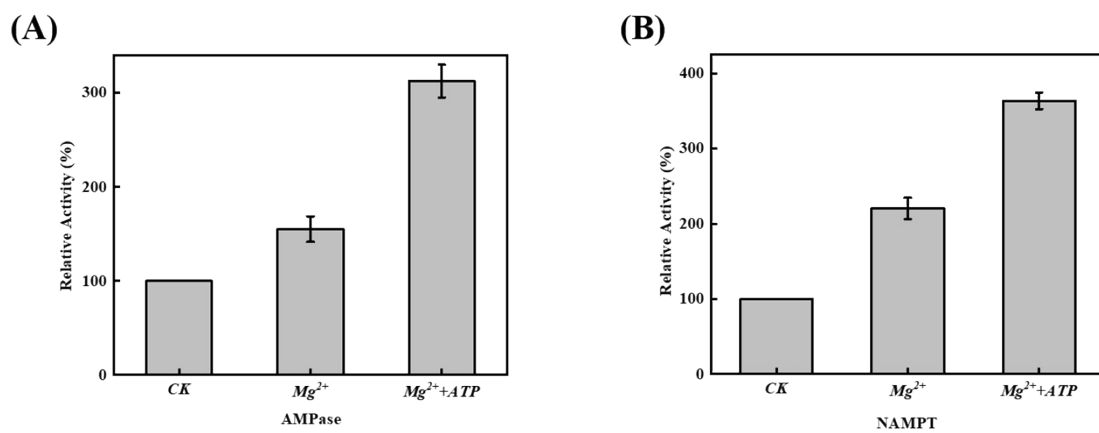

**Figure S3 Effect of  $Mg^{2+}$  and ATP on enzyme activity of AMPase(A) and NAMPT(B). CK represents the control group.**

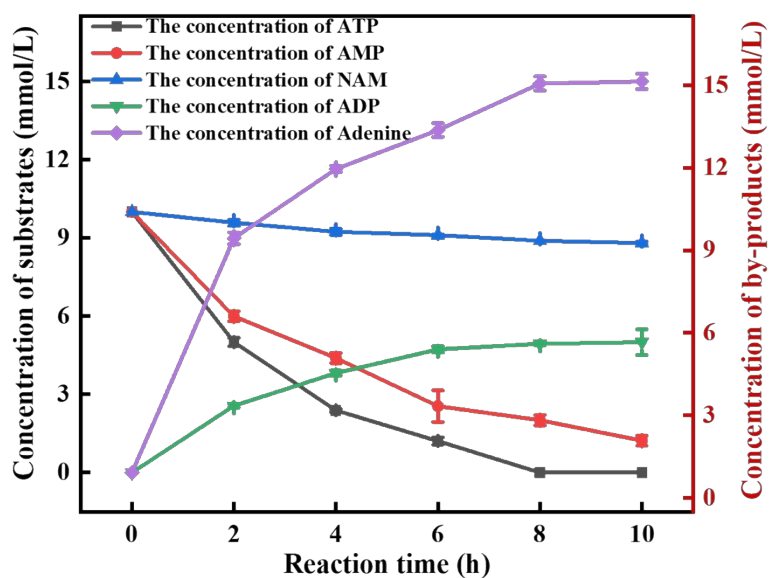

**Supplementary Figure S4** The consumption of ATP, AMP, and NAM, and the generation of by-products ADP and adenine under the condition of AMPase/RPPK/NAMPT ratio of 1:6:10.

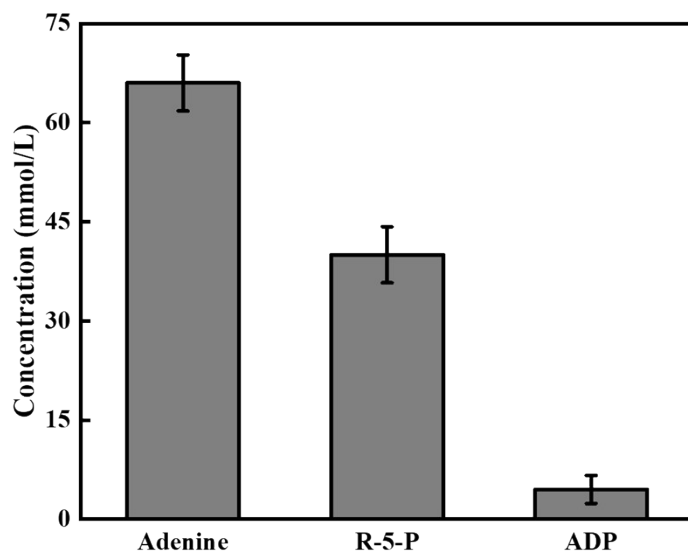

**Supplementary Figure S5** The generation of by-products of adenine, R-5-P and ADP with the four-enzyme cascade catalysis system in vitro.
